# Supplementary material for: Unraveling the Transmission Ecology of Polio
Source: PLoS Biol. 2015 Jun 19;13(6):e1002172. doi: 10.1371/journal.pbio.1002172 (PMC4474890; doi:10.1371/journal.pbio.1002172)
Supplement: S3 Data — File containing annual estimates of the population size for each state in the US from 1910–2008; these are the intercensal estimates by state from the US Census Bureau. (CSV) [file pbio.1002172.s004.csv]

state	year	population.size
AL	1910	2150000
AL	1911	2185000
AL	1912	2217000
AL	1913	2279000
AL	1914	2336000
AL	1915	2345000
AL	1916	2359000
AL	1917	2361000
AL	1918	2343000
AL	1919	2337000
AL	1920	2359000
AL	1921	2402000
AL	1922	2434000
AL	1923	2464000
AL	1924	2501000
AL	1925	2534000
AL	1926	2567000
AL	1927	2609000
AL	1928	2640000
AL	1929	2644000
AL	1930	2647000
AL	1931	2649000
AL	1932	2653000
AL	1933	2661000
AL	1934	2685000
AL	1935	2719000
AL	1936	2743000
AL	1937	2762000
AL	1938	2787000
AL	1939	2814000
AL	1940	2845000
AL	1941	2902000
AL	1942	2941000
AL	1943	2902000
AL	1944	2802000
AL	1945	2775000
AL	1946	2911000
AL	1947	2942000
AL	1948	2969000
AL	1949	3e+06
AL	1950	3058000
AL	1951	3059000
AL	1952	3068000
AL	1953	3053000
AL	1954	3014000
AL	1955	3050000
AL	1956	3071000
AL	1957	3109000
AL	1958	3163000
AL	1959	3204000
AL	1960	3274000
AL	1961	3316000
AL	1962	3323000
AL	1963	3358000
AL	1964	3395000
AL	1965	3443000
AL	1966	3464000
AL	1967	3458000
AL	1968	3446000
AL	1969	3440000
AL	1970	3444354
AL	1971	3497076
AL	1972	3539400
AL	1973	3579780
AL	1974	3626499
AL	1975	3678814
AL	1976	3735139
AL	1977	3780403
AL	1978	3831836
AL	1979	3866248
AL	1980	3893888
AL	1981	3918531
AL	1982	3925266
AL	1983	3934102
AL	1984	3951820
AL	1985	3972523
AL	1986	3991569
AL	1987	4015264
AL	1988	4023844
AL	1989	4030222
AL	1990	4040587
AL	1991	4091025
AL	1992	4139269
AL	1993	4193114
AL	1994	4232965
AL	1995	4262731
AL	1996	4290403
AL	1997	4320281
AL	1998	4351037
AL	1999	4369862
AL	2000	4451687
AL	2001	4462832
AL	2002	4469906
AL	2003	4486598
AL	2004	4506574
AL	2005	4537299
AL	2006	4587564
AL	2007	4626595
AL	2008	4661900
AR	1910	1583000
AR	1911	1610000
AR	1912	1636000
AR	1913	1664000
AR	1914	1688000
AR	1915	1702000
AR	1916	1719000
AR	1917	1737000
AR	1918	1749000
AR	1919	1742000
AR	1920	1756000
AR	1921	1769000
AR	1922	1772000
AR	1923	1784000
AR	1924	1800000
AR	1925	1812000
AR	1926	1826000
AR	1927	1840000
AR	1928	1847000
AR	1929	1852000
AR	1930	1859000
AR	1931	1848000
AR	1932	1836000
AR	1933	1854000
AR	1934	1878000
AR	1935	1890000
AR	1936	1892000
AR	1937	1903000
AR	1938	1928000
AR	1939	1948000
AR	1940	1955000
AR	1941	1969000
AR	1942	1977000
AR	1943	1843000
AR	1944	1768000
AR	1945	1762000
AR	1946	1797000
AR	1947	1836000
AR	1948	1825000
AR	1949	1844000
AR	1950	1908000
AR	1951	1901000
AR	1952	1838000
AR	1953	1780000
AR	1954	1734000
AR	1955	1725000
AR	1956	1704000
AR	1957	1733000
AR	1958	1726000
AR	1959	1756000
AR	1960	1789000
AR	1961	1806000
AR	1962	1853000
AR	1963	1875000
AR	1964	1897000
AR	1965	1894000
AR	1966	1899000
AR	1967	1901000
AR	1968	1902000
AR	1969	1913000
AR	1970	1923322
AR	1971	1972312
AR	1972	2018638
AR	1973	2059256
AR	1974	2101403
AR	1975	2159526
AR	1976	2170161
AR	1977	2209010
AR	1978	2243127
AR	1979	2271333
AR	1980	2286435
AR	1981	2293201
AR	1982	2294257
AR	1983	2305761
AR	1984	2319768
AR	1985	2327046
AR	1986	2331984
AR	1987	2342355
AR	1988	2342656
AR	1989	2346358
AR	1990	2350725
AR	1991	2370666
AR	1992	2394098
AR	1993	2423743
AR	1994	2450605
AR	1995	2480121
AR	1996	2504858
AR	1997	2524007
AR	1998	2538202
AR	1999	2551373
AR	2000	2678217
AR	2001	2689601
AR	2002	2701889
AR	2003	2717909
AR	2004	2740191
AR	2005	2768918
AR	2006	2804199
AR	2007	2830557
AR	2008	2855390
AZ	1910	206000
AZ	1911	212000
AZ	1912	217000
AZ	1913	236000
AZ	1914	253000
AZ	1915	263000
AZ	1916	282000
AZ	1917	311000
AZ	1918	320000
AZ	1919	329000
AZ	1920	340000
AZ	1921	351000
AZ	1922	360000
AZ	1923	371000
AZ	1924	382000
AZ	1925	393000
AZ	1926	403000
AZ	1927	414000
AZ	1928	422000
AZ	1929	430000
AZ	1930	434000
AZ	1931	429000
AZ	1932	426000
AZ	1933	426000
AZ	1934	428000
AZ	1935	434000
AZ	1936	443000
AZ	1937	453000
AZ	1938	466000
AZ	1939	484000
AZ	1940	499000
AZ	1941	490000
AZ	1942	524000
AZ	1943	692000
AZ	1944	610000
AZ	1945	594000
AZ	1946	616000
AZ	1947	653000
AZ	1948	690000
AZ	1949	714000
AZ	1950	756000
AZ	1951	785000
AZ	1952	842000
AZ	1953	894000
AZ	1954	933000
AZ	1955	987000
AZ	1956	1053000
AZ	1957	1125000
AZ	1958	1193000
AZ	1959	1261000
AZ	1960	1321000
AZ	1961	1407000
AZ	1962	1471000
AZ	1963	1521000
AZ	1964	1556000
AZ	1965	1584000
AZ	1966	1614000
AZ	1967	1646000
AZ	1968	1682000
AZ	1969	1737000
AZ	1970	1775399
AZ	1971	1895814
AZ	1972	2008291
AZ	1973	2124438
AZ	1974	2223196
AZ	1975	2284847
AZ	1976	2346157
AZ	1977	2425197
AZ	1978	2515316
AZ	1979	2635571
AZ	1980	2718215
AZ	1981	2810107
AZ	1982	2889861
AZ	1983	2968925
AZ	1984	3067135
AZ	1985	3183538
AZ	1986	3308262
AZ	1987	3437103
AZ	1988	3535183
AZ	1989	3622185
AZ	1990	3665228
AZ	1991	3762394
AZ	1992	3867333
AZ	1993	3993390
AZ	1994	4147561
AZ	1995	4306908
AZ	1996	4432308
AZ	1997	4552207
AZ	1998	4667277
AZ	1999	4778332
AZ	2000	5166810
AZ	2001	5303632
AZ	2002	5449195
AZ	2003	5585512
AZ	2004	5750475
AZ	2005	5961239
AZ	2006	6178251
AZ	2007	6353421
AZ	2008	6500180
CA	1910	2406000
CA	1911	2534000
CA	1912	2668000
CA	1913	2811000
CA	1914	2934000
CA	1915	3008000
CA	1916	3071000
CA	1917	3171000
CA	1918	3262000
CA	1919	3339000
CA	1920	3554000
CA	1921	3795000
CA	1922	3991000
CA	1923	4270000
CA	1924	4541000
CA	1925	4730000
CA	1926	4929000
CA	1927	5147000
CA	1928	5344000
CA	1929	5531000
CA	1930	5711000
CA	1931	5824000
CA	1932	5894000
CA	1933	5963000
CA	1934	6060000
CA	1935	6175000
CA	1936	6341000
CA	1937	6528000
CA	1938	6656000
CA	1939	6785000
CA	1940	6950000
CA	1941	7237000
CA	1942	7735000
CA	1943	8506000
CA	1944	8945000
CA	1945	9344000
CA	1946	9559000
CA	1947	9832000
CA	1948	10064000
CA	1949	10337000
CA	1950	10677000
CA	1951	11134000
CA	1952	11635000
CA	1953	12251000
CA	1954	12746000
CA	1955	13133000
CA	1956	13713000
CA	1957	14264000
CA	1958	14880000
CA	1959	15467000
CA	1960	15870000
CA	1961	16497000
CA	1962	17072000
CA	1963	17668000
CA	1964	18151000
CA	1965	18585000
CA	1966	18858000
CA	1967	19176000
CA	1968	19394000
CA	1969	19711000
CA	1970	19971069
CA	1971	20345939
CA	1972	20585469
CA	1973	20868728
CA	1974	21173865
CA	1975	21537849
CA	1976	21935909
CA	1977	22352396
CA	1978	22835958
CA	1979	23256880
CA	1980	23667902
CA	1981	24285933
CA	1982	24820009
CA	1983	25360026
CA	1984	25844393
CA	1985	26441109
CA	1986	27102237
CA	1987	27777158
CA	1988	28464249
CA	1989	29218164
CA	1990	29760021
CA	1991	30414114
CA	1992	30875920
CA	1993	31147208
CA	1994	31317179
CA	1995	31493525
CA	1996	31780829
CA	1997	32217708
CA	1998	32682794
CA	1999	33145121
CA	2000	33998767
CA	2001	34507030
CA	2002	34916495
CA	2003	35307398
CA	2004	35629666
CA	2005	35885415
CA	2006	36121296
CA	2007	36377534
CA	2008	36756666
CO	1910	804000
CO	1911	821000
CO	1912	832000
CO	1913	835000
CO	1914	846000
CO	1915	868000
CO	1916	892000
CO	1917	910000
CO	1918	906000
CO	1919	938000
CO	1920	937000
CO	1921	961000
CO	1922	965000
CO	1923	984000
CO	1924	1014000
CO	1925	1019000
CO	1926	1016000
CO	1927	1028000
CO	1928	1014000
CO	1929	1008000
CO	1930	1040000
CO	1931	1056000
CO	1932	1066000
CO	1933	1071000
CO	1934	1075000
CO	1935	1078000
CO	1936	1090000
CO	1937	1104000
CO	1938	1112000
CO	1939	1120000
CO	1940	1130000
CO	1941	1124000
CO	1942	1113000
CO	1943	1153000
CO	1944	1137000
CO	1945	1116000
CO	1946	1203000
CO	1947	1237000
CO	1948	1263000
CO	1949	1295000
CO	1950	1325000
CO	1951	1326000
CO	1952	1365000
CO	1953	1431000
CO	1954	1493000
CO	1955	1546000
CO	1956	1625000
CO	1957	1664000
CO	1958	1667000
CO	1959	1710000
CO	1960	1769000
CO	1961	1844000
CO	1962	1899000
CO	1963	1936000
CO	1964	1970000
CO	1965	1985000
CO	1966	2007000
CO	1967	2053000
CO	1968	2120000
CO	1969	2166000
CO	1970	2209596
CO	1971	2303524
CO	1972	2404619
CO	1973	2495868
CO	1974	2541406
CO	1975	2586192
CO	1976	2632306
CO	1977	2696140
CO	1978	2766748
CO	1979	2849234
CO	1980	2889964
CO	1981	2977898
CO	1982	3061564
CO	1983	3133630
CO	1984	3169992
CO	1985	3208723
CO	1986	3237450
CO	1987	3260480
CO	1988	3262281
CO	1989	3275818
CO	1990	3294394
CO	1991	3367567
CO	1992	3459995
CO	1993	3560884
CO	1994	3653910
CO	1995	3738061
CO	1996	3812716
CO	1997	3891293
CO	1998	3968967
CO	1999	4056133
CO	2000	4327788
CO	2001	4431918
CO	2002	4503156
CO	2003	4548339
CO	2004	4600050
CO	2005	4662734
CO	2006	4751474
CO	2007	4842770
CO	2008	4939456
CT	1910	1122000
CT	1911	1149000
CT	1912	1176000
CT	1913	1208000
CT	1914	1233000
CT	1915	1258000
CT	1916	1294000
CT	1917	1327000
CT	1918	1329000
CT	1919	1359000
CT	1920	1391000
CT	1921	1415000
CT	1922	1431000
CT	1923	1455000
CT	1924	1481000
CT	1925	1506000
CT	1926	1531000
CT	1927	1557000
CT	1928	1577000
CT	1929	1594000
CT	1930	1613000
CT	1931	1628000
CT	1932	1637000
CT	1933	1642000
CT	1934	1650000
CT	1935	1666000
CT	1936	1672000
CT	1937	1678000
CT	1938	1684000
CT	1939	1696000
CT	1940	1708000
CT	1941	1746000
CT	1942	1792000
CT	1943	1792000
CT	1944	1778000
CT	1945	1769000
CT	1946	1906000
CT	1947	1967000
CT	1948	2014000
CT	1949	2032000
CT	1950	2016000
CT	1951	2028000
CT	1952	2081000
CT	1953	2168000
CT	1954	2249000
CT	1955	2300000
CT	1956	2316000
CT	1957	2359000
CT	1958	2446000
CT	1959	2523000
CT	1960	2544000
CT	1961	2586000
CT	1962	2647000
CT	1963	2727000
CT	1964	2798000
CT	1965	2857000
CT	1966	2903000
CT	1967	2935000
CT	1968	2964000
CT	1969	3e+06
CT	1970	3032217
CT	1971	3060938
CT	1972	3068699
CT	1973	3067814
CT	1974	3074047
CT	1975	3082500
CT	1976	3083335
CT	1977	3085722
CT	1978	3091627
CT	1979	3095917
CT	1980	3107576
CT	1981	3128836
CT	1982	3139013
CT	1983	3162354
CT	1984	3180014
CT	1985	3201131
CT	1986	3223740
CT	1987	3247291
CT	1988	3271953
CT	1989	3283403
CT	1990	3287116
CT	1991	3288640
CT	1992	3274997
CT	1993	3272325
CT	1994	3268346
CT	1995	3265293
CT	1996	3267030
CT	1997	3268514
CT	1998	3272563
CT	1999	3282031
CT	2000	3411714
CT	2001	3428208
CT	2002	3448261
CT	2003	3467932
CT	2004	3475351
CT	2005	3478714
CT	2006	3487896
CT	2007	3489868
CT	2008	3501252
DC	1910	334000
DC	1911	344000
DC	1912	340000
DC	1913	358000
DC	1914	368000
DC	1915	361000
DC	1916	360000
DC	1917	385000
DC	1918	418000
DC	1919	445000
DC	1920	440000
DC	1921	446000
DC	1922	450000
DC	1923	453000
DC	1924	456000
DC	1925	461000
DC	1926	469000
DC	1927	476000
DC	1928	479000
DC	1929	483000
DC	1930	488000
DC	1931	504000
DC	1932	513000
DC	1933	529000
DC	1934	568000
DC	1935	608000
DC	1936	629000
DC	1937	616000
DC	1938	638000
DC	1939	658000
DC	1940	690000
DC	1941	764000
DC	1942	851000
DC	1943	9e+05
DC	1944	881000
DC	1945	876000
DC	1946	899000
DC	1947	888000
DC	1948	840000
DC	1949	807000
DC	1950	806000
DC	1951	808000
DC	1952	805000
DC	1953	810000
DC	1954	791000
DC	1955	785000
DC	1956	759000
DC	1957	763000
DC	1958	757000
DC	1959	761000
DC	1960	765000
DC	1961	778000
DC	1962	788000
DC	1963	798000
DC	1964	798000
DC	1965	797000
DC	1966	791000
DC	1967	791000
DC	1968	778000
DC	1969	762000
DC	1970	756668
DC	1971	749781
DC	1972	742241
DC	1973	731488
DC	1974	717947
DC	1975	706871
DC	1976	692295
DC	1977	677228
DC	1978	665052
DC	1979	650016
DC	1980	638333
DC	1981	636893
DC	1982	634174
DC	1983	632433
DC	1984	633382
DC	1985	634549
DC	1986	638269
DC	1987	636930
DC	1988	630432
DC	1989	624168
DC	1990	606900
DC	1991	593239
DC	1992	584183
DC	1993	576358
DC	1994	564982
DC	1995	551273
DC	1996	538273
DC	1997	528752
DC	1998	521426
DC	1999	519000
DC	2000	571723
DC	2001	577678
DC	2002	579112
DC	2003	577371
DC	2004	579521
DC	2005	582049
DC	2006	585419
DC	2007	587868
DC	2008	591833
DE	1910	203000
DE	1911	207000
DE	1912	209000
DE	1913	213000
DE	1914	216000
DE	1915	217000
DE	1916	219000
DE	1917	222000
DE	1918	220000
DE	1919	221000
DE	1920	219000
DE	1921	216000
DE	1922	214000
DE	1923	215000
DE	1924	219000
DE	1925	222000
DE	1926	225000
DE	1927	229000
DE	1928	233000
DE	1929	236000
DE	1930	239000
DE	1931	242000
DE	1932	245000
DE	1933	248000
DE	1934	250000
DE	1935	252000
DE	1936	253000
DE	1937	254000
DE	1938	257000
DE	1939	263000
DE	1940	269000
DE	1941	275000
DE	1942	279000
DE	1943	282000
DE	1944	285000
DE	1945	286000
DE	1946	299000
DE	1947	305000
DE	1948	312000
DE	1949	316000
DE	1950	321000
DE	1951	331000
DE	1952	341000
DE	1953	351000
DE	1954	368000
DE	1955	389000
DE	1956	408000
DE	1957	426000
DE	1958	433000
DE	1959	441000
DE	1960	449000
DE	1961	461000
DE	1962	469000
DE	1963	483000
DE	1964	497000
DE	1965	507000
DE	1966	516000
DE	1967	525000
DE	1968	534000
DE	1969	540000
DE	1970	548104
DE	1971	564708
DE	1972	572913
DE	1973	577759
DE	1974	581418
DE	1975	586589
DE	1976	590166
DE	1977	591829
DE	1978	594776
DE	1979	594984
DE	1980	594338
DE	1981	595975
DE	1982	599148
DE	1983	605458
DE	1984	611565
DE	1985	618280
DE	1986	627559
DE	1987	636947
DE	1988	647622
DE	1989	658273
DE	1990	666168
DE	1991	680495
DE	1992	690158
DE	1993	699475
DE	1994	708416
DE	1995	718265
DE	1996	727090
DE	1997	735024
DE	1998	744066
DE	1999	753538
DE	2000	786404
DE	2001	794498
DE	2002	803774
DE	2003	814262
DE	2004	825682
DE	2005	838519
DE	2006	850366
DE	2007	861953
DE	2008	873092
FL	1910	756000
FL	1911	773000
FL	1912	801000
FL	1913	828000
FL	1914	871000
FL	1915	922000
FL	1916	924000
FL	1917	895000
FL	1918	865000
FL	1919	898000
FL	1920	962000
FL	1921	997000
FL	1922	1044000
FL	1923	1097000
FL	1924	1160000
FL	1925	1264000
FL	1926	1368000
FL	1927	1418000
FL	1928	1433000
FL	1929	1445000
FL	1930	1471000
FL	1931	1493000
FL	1932	1521000
FL	1933	1552000
FL	1934	1585000
FL	1935	1613000
FL	1936	1651000
FL	1937	1709000
FL	1938	1771000
FL	1939	1836000
FL	1940	1915000
FL	1941	2017000
FL	1942	2151000
FL	1943	2451000
FL	1944	2420000
FL	1945	2465000
FL	1946	2440000
FL	1947	2528000
FL	1948	2578000
FL	1949	2668000
FL	1950	2810000
FL	1951	2980000
FL	1952	3157000
FL	1953	3310000
FL	1954	3505000
FL	1955	3747000
FL	1956	4047000
FL	1957	4372000
FL	1958	4630000
FL	1959	4808000
FL	1960	5004000
FL	1961	5243000
FL	1962	5458000
FL	1963	5628000
FL	1964	5781000
FL	1965	5954000
FL	1966	6104000
FL	1967	6242000
FL	1968	6433000
FL	1969	6641000
FL	1970	6791418
FL	1971	7158304
FL	1972	7511463
FL	1973	7913696
FL	1974	8298762
FL	1975	8518422
FL	1976	8667379
FL	1977	8856183
FL	1978	9102032
FL	1979	9426159
FL	1980	9746324
FL	1981	10192774
FL	1982	10471407
FL	1983	10749851
FL	1984	11039925
FL	1985	11351118
FL	1986	11667505
FL	1987	11997283
FL	1988	12306395
FL	1989	12637715
FL	1990	12937926
FL	1991	13289497
FL	1992	13504775
FL	1993	13713593
FL	1994	13961798
FL	1995	14185403
FL	1996	14426911
FL	1997	14683350
FL	1998	14908230
FL	1999	15111244
FL	2000	16047246
FL	2001	16340734
FL	2002	16652679
FL	2003	16937337
FL	2004	17313811
FL	2005	17702476
FL	2006	18019093
FL	2007	18199526
FL	2008	18328340
GA	1910	2618000
GA	1911	2644000
GA	1912	2676000
GA	1913	2733000
GA	1914	2776000
GA	1915	2810000
GA	1916	2856000
GA	1917	2885000
GA	1918	2941000
GA	1919	2870000
GA	1920	2926000
GA	1921	2965000
GA	1922	2965000
GA	1923	2954000
GA	1924	2920000
GA	1925	2883000
GA	1926	2869000
GA	1927	2891000
GA	1928	2903000
GA	1929	2903000
GA	1930	2910000
GA	1931	2924000
GA	1932	2935000
GA	1933	2950000
GA	1934	2964000
GA	1935	2955000
GA	1936	2978000
GA	1937	3037000
GA	1938	3091000
GA	1939	3120000
GA	1940	3119000
GA	1941	3179000
GA	1942	3209000
GA	1943	3245000
GA	1944	3176000
GA	1945	3119000
GA	1946	3242000
GA	1947	3272000
GA	1948	3259000
GA	1949	3325000
GA	1950	3458000
GA	1951	3531000
GA	1952	3584000
GA	1953	3558000
GA	1954	3602000
GA	1955	3636000
GA	1956	3701000
GA	1957	3766000
GA	1958	3804000
GA	1959	3868000
GA	1960	3956000
GA	1961	4015000
GA	1962	4086000
GA	1963	4172000
GA	1964	4258000
GA	1965	4332000
GA	1966	4379000
GA	1967	4408000
GA	1968	4482000
GA	1969	4551000
GA	1970	4587930
GA	1971	4711550
GA	1972	4809490
GA	1973	4910374
GA	1974	4999419
GA	1975	5064075
GA	1976	5132812
GA	1977	5219697
GA	1978	5295751
GA	1979	5401384
GA	1980	5463105
GA	1981	5568345
GA	1982	5649792
GA	1983	5728250
GA	1984	5834954
GA	1985	5962661
GA	1986	6084666
GA	1987	6208467
GA	1988	6316142
GA	1989	6411099
GA	1990	6478216
GA	1991	6621279
GA	1992	6759474
GA	1993	6894092
GA	1994	7045900
GA	1995	7188538
GA	1996	7332225
GA	1997	7486094
GA	1998	7636522
GA	1999	7788240
GA	2000	8230053
GA	2001	8418592
GA	2002	8583674
GA	2003	8732924
GA	2004	8910741
GA	2005	9093958
GA	2006	9318715
GA	2007	9523297
GA	2008	9685744
IA	1910	2228000
IA	1911	2249000
IA	1912	2279000
IA	1913	2305000
IA	1914	2338000
IA	1915	2366000
IA	1916	2376000
IA	1917	2382000
IA	1918	2351000
IA	1919	2379000
IA	1920	2400000
IA	1921	2407000
IA	1922	2428000
IA	1923	2425000
IA	1924	2420000
IA	1925	2427000
IA	1926	2432000
IA	1927	2441000
IA	1928	2450000
IA	1929	2460000
IA	1930	2475000
IA	1931	2482000
IA	1932	2489000
IA	1933	2495000
IA	1934	2510000
IA	1935	2524000
IA	1936	2509000
IA	1937	2498000
IA	1938	2494000
IA	1939	2520000
IA	1940	2537000
IA	1941	2491000
IA	1942	2439000
IA	1943	2334000
IA	1944	2301000
IA	1945	2308000
IA	1946	2467000
IA	1947	2509000
IA	1948	2543000
IA	1949	2578000
IA	1950	2625000
IA	1951	2617000
IA	1952	2626000
IA	1953	2629000
IA	1954	2626000
IA	1955	2679000
IA	1956	2703000
IA	1957	2716000
IA	1958	2708000
IA	1959	2729000
IA	1960	2756000
IA	1961	2756000
IA	1962	2750000
IA	1963	2747000
IA	1964	2746000
IA	1965	2742000
IA	1966	2762000
IA	1967	2793000
IA	1968	2803000
IA	1969	2805000
IA	1970	2825368
IA	1971	2851705
IA	1972	2860287
IA	1973	2863715
IA	1974	2867530
IA	1975	2880847
IA	1976	2903082
IA	1977	2913573
IA	1978	2918069
IA	1979	2915739
IA	1980	2913808
IA	1981	2907983
IA	1982	2888189
IA	1983	2870543
IA	1984	2858618
IA	1985	2829684
IA	1986	2791970
IA	1987	2767011
IA	1988	2768388
IA	1989	2770592
IA	1990	2776755
IA	1991	2791227
IA	1992	2806923
IA	1993	2820525
IA	1994	2829422
IA	1995	2840860
IA	1996	2848473
IA	1997	2854396
IA	1998	2861025
IA	1999	2869413
IA	2000	2928046
IA	2001	2929294
IA	2002	2929395
IA	2003	2933407
IA	2004	2942739
IA	2005	2951775
IA	2006	2967270
IA	2007	2983360
IA	2008	3002555
ID	1910	329000
ID	1911	343000
ID	1912	359000
ID	1913	371000
ID	1914	384000
ID	1915	394000
ID	1916	405000
ID	1917	413000
ID	1918	405000
ID	1919	424000
ID	1920	433000
ID	1921	435000
ID	1922	436000
ID	1923	436000
ID	1924	434000
ID	1925	436000
ID	1926	441000
ID	1927	447000
ID	1928	449000
ID	1929	447000
ID	1930	447000
ID	1931	454000
ID	1932	459000
ID	1933	464000
ID	1934	473000
ID	1935	481000
ID	1936	495000
ID	1937	507000
ID	1938	513000
ID	1939	521000
ID	1940	522000
ID	1941	501000
ID	1942	478000
ID	1943	5e+05
ID	1944	529000
ID	1945	507000
ID	1946	509000
ID	1947	522000
ID	1948	551000
ID	1949	570000
ID	1950	590000
ID	1951	589000
ID	1952	587000
ID	1953	596000
ID	1954	6e+05
ID	1955	618000
ID	1956	628000
ID	1957	642000
ID	1958	646000
ID	1959	657000
ID	1960	671000
ID	1961	684000
ID	1962	692000
ID	1963	683000
ID	1964	680000
ID	1965	686000
ID	1966	689000
ID	1967	688000
ID	1968	695000
ID	1969	707000
ID	1970	713015
ID	1971	738753
ID	1972	763237
ID	1973	782074
ID	1974	807990
ID	1975	831982
ID	1976	856983
ID	1977	883469
ID	1978	910690
ID	1979	932627
ID	1980	943935
ID	1981	962204
ID	1982	973721
ID	1983	981869
ID	1984	990839
ID	1985	994051
ID	1986	990224
ID	1987	984997
ID	1988	985664
ID	1989	994416
ID	1990	1006749
ID	1991	1038915
ID	1992	1066490
ID	1993	1101204
ID	1994	1135459
ID	1995	1165000
ID	1996	1187706
ID	1997	1210638
ID	1998	1230923
ID	1999	1251700
ID	2000	1299474
ID	2001	1320732
ID	2002	1341408
ID	2003	1363010
ID	2004	1390329
ID	2005	1424127
ID	2006	1461183
ID	2007	1496145
ID	2008	1523816
IL	1910	5668000
IL	1911	5757000
IL	1912	5828000
IL	1913	5961000
IL	1914	6109000
IL	1915	6194000
IL	1916	6274000
IL	1917	6313000
IL	1918	6275000
IL	1919	6392000
IL	1920	6663000
IL	1921	6858000
IL	1922	6958000
IL	1923	7068000
IL	1924	7215000
IL	1925	7306000
IL	1926	7395000
IL	1927	7519000
IL	1928	7576000
IL	1929	7606000
IL	1930	7644000
IL	1931	7687000
IL	1932	7736000
IL	1933	7768000
IL	1934	7772000
IL	1935	7797000
IL	1936	7840000
IL	1937	7857000
IL	1938	7866000
IL	1939	7890000
IL	1940	7905000
IL	1941	7995000
IL	1942	8057000
IL	1943	7761000
IL	1944	7719000
IL	1945	7601000
IL	1946	8155000
IL	1947	8341000
IL	1948	8552000
IL	1949	8670000
IL	1950	8738000
IL	1951	8790000
IL	1952	8956000
IL	1953	9065000
IL	1954	9252000
IL	1955	9435000
IL	1956	9530000
IL	1957	9668000
IL	1958	9886000
IL	1959	9986000
IL	1960	10086000
IL	1961	10130000
IL	1962	10280000
IL	1963	10402000
IL	1964	10580000
IL	1965	10693000
IL	1966	10836000
IL	1967	10947000
IL	1968	10995000
IL	1969	11039000
IL	1970	11110285
IL	1971	11202397
IL	1972	11251948
IL	1973	11251367
IL	1974	11262145
IL	1975	11291743
IL	1976	11342853
IL	1977	11386316
IL	1978	11412561
IL	1979	11396837
IL	1980	11426518
IL	1981	11443458
IL	1982	11423412
IL	1983	11408818
IL	1984	11412132
IL	1985	11399806
IL	1986	11387257
IL	1987	11391178
IL	1988	11390183
IL	1989	11409782
IL	1990	11430602
IL	1991	11535973
IL	1992	11635197
IL	1993	11725984
IL	1994	11804986
IL	1995	11884935
IL	1996	11953003
IL	1997	12011509
IL	1998	12069774
IL	1999	12128370
IL	2000	12437888
IL	2001	12510596
IL	2002	12565228
IL	2003	12611047
IL	2004	12665718
IL	2005	12704063
IL	2006	12759673
IL	2007	12825809
IL	2008	12901563
IN	1910	2713000
IN	1911	2751000
IN	1912	2785000
IN	1913	2824000
IN	1914	2857000
IN	1915	2873000
IN	1916	2897000
IN	1917	2910000
IN	1918	2880000
IN	1919	2906000
IN	1920	2947000
IN	1921	2976000
IN	1922	2965000
IN	1923	3042000
IN	1924	3086000
IN	1925	3119000
IN	1926	3148000
IN	1927	3191000
IN	1928	3212000
IN	1929	3226000
IN	1930	3242000
IN	1931	3257000
IN	1932	3281000
IN	1933	3304000
IN	1934	3319000
IN	1935	3332000
IN	1936	3348000
IN	1937	3374000
IN	1938	3386000
IN	1939	3403000
IN	1940	3433000
IN	1941	3483000
IN	1942	3507000
IN	1943	3449000
IN	1944	3440000
IN	1945	3427000
IN	1946	3702000
IN	1947	3779000
IN	1948	3877000
IN	1949	3958000
IN	1950	3967000
IN	1951	4096000
IN	1952	4148000
IN	1953	4182000
IN	1954	4264000
IN	1955	4363000
IN	1956	4458000
IN	1957	4529000
IN	1958	4583000
IN	1959	4613000
IN	1960	4674000
IN	1961	4730000
IN	1962	4736000
IN	1963	4799000
IN	1964	4856000
IN	1965	4922000
IN	1966	4999000
IN	1967	5053000
IN	1968	5093000
IN	1969	5143000
IN	1970	5195392
IN	1971	5253396
IN	1972	5302435
IN	1973	5338277
IN	1974	5361890
IN	1975	5365766
IN	1976	5389088
IN	1977	5425638
IN	1978	5470214
IN	1979	5501174
IN	1980	5490224
IN	1981	5480435
IN	1982	5467922
IN	1983	5450395
IN	1984	5458322
IN	1985	5459211
IN	1986	5454108
IN	1987	5473012
IN	1988	5491735
IN	1989	5523693
IN	1990	5544159
IN	1991	5602062
IN	1992	5648649
IN	1993	5701965
IN	1994	5745626
IN	1995	5791819
IN	1996	5834908
IN	1997	5872370
IN	1998	5907617
IN	1999	5942901
IN	2000	6091392
IN	2001	6123942
IN	2002	6146974
IN	2003	6178828
IN	2004	6210801
IN	2005	6248569
IN	2006	6294124
IN	2007	6335862
IN	2008	6376792
KS	1910	1692000
KS	1911	1684000
KS	1912	1671000
KS	1913	1663000
KS	1914	1662000
KS	1915	1687000
KS	1916	1727000
KS	1917	1748000
KS	1918	1729000
KS	1919	1756000
KS	1920	1769000
KS	1921	1779000
KS	1922	1799000
KS	1923	1808000
KS	1924	1807000
KS	1925	1825000
KS	1926	1836000
KS	1927	1836000
KS	1928	1850000
KS	1929	1867000
KS	1930	1883000
KS	1931	1881000
KS	1932	1883000
KS	1933	1877000
KS	1934	1868000
KS	1935	1872000
KS	1936	1869000
KS	1937	1856000
KS	1938	1842000
KS	1939	1824000
KS	1940	1788000
KS	1941	1765000
KS	1942	1760000
KS	1943	1796000
KS	1944	1779000
KS	1945	1731000
KS	1946	1805000
KS	1947	1853000
KS	1948	1892000
KS	1949	1925000
KS	1950	1916000
KS	1951	1950000
KS	1952	1977000
KS	1953	1994000
KS	1954	2042000
KS	1955	2093000
KS	1956	2119000
KS	1957	2128000
KS	1958	2142000
KS	1959	2160000
KS	1960	2183000
KS	1961	2215000
KS	1962	2231000
KS	1963	2217000
KS	1964	2209000
KS	1965	2206000
KS	1966	2200000
KS	1967	2197000
KS	1968	2216000
KS	1969	2236000
KS	1970	2249071
KS	1971	2246600
KS	1972	2256375
KS	1973	2265603
KS	1974	2269499
KS	1975	2280578
KS	1976	2301001
KS	1977	2320647
KS	1978	2335657
KS	1979	2350906
KS	1980	2363679
KS	1981	2384849
KS	1982	2401202
KS	1983	2415531
KS	1984	2424086
KS	1985	2427405
KS	1986	2432619
KS	1987	2445367
KS	1988	2461996
KS	1989	2472849
KS	1990	2477574
KS	1991	2495209
KS	1992	2526042
KS	1993	2547605
KS	1994	2569118
KS	1995	2586942
KS	1996	2598266
KS	1997	2616339
KS	1998	2638667
KS	1999	2654052
KS	2000	2692681
KS	2001	2701346
KS	2002	2712561
KS	2003	2722070
KS	2004	2731069
KS	2005	2742204
KS	2006	2756267
KS	2007	2777382
KS	2008	2802134
KY	1910	2299000
KY	1911	2324000
KY	1912	2347000
KY	1913	2374000
KY	1914	2395000
KY	1915	2401000
KY	1916	2411000
KY	1917	2421000
KY	1918	2425000
KY	1919	2413000
KY	1920	2421000
KY	1921	2436000
KY	1922	2450000
KY	1923	2480000
KY	1924	2531000
KY	1925	2520000
KY	1926	2545000
KY	1927	2551000
KY	1928	2567000
KY	1929	2606000
KY	1930	2623000
KY	1931	2652000
KY	1932	2676000
KY	1933	2698000
KY	1934	2722000
KY	1935	2748000
KY	1936	2768000
KY	1937	2784000
KY	1938	2800000
KY	1939	2825000
KY	1940	2859000
KY	1941	2824000
KY	1942	2797000
KY	1943	2693000
KY	1944	2631000
KY	1945	2597000
KY	1946	2761000
KY	1947	2803000
KY	1948	2817000
KY	1949	2849000
KY	1950	2936000
KY	1951	2941000
KY	1952	2920000
KY	1953	2903000
KY	1954	2902000
KY	1955	2910000
KY	1956	2898000
KY	1957	2928000
KY	1958	2961000
KY	1959	2999000
KY	1960	3041000
KY	1961	3054000
KY	1962	3079000
KY	1963	3096000
KY	1964	3129000
KY	1965	3140000
KY	1966	3147000
KY	1967	3172000
KY	1968	3195000
KY	1969	3198000
KY	1970	3220711
KY	1971	3298053
KY	1972	3335728
KY	1973	3371024
KY	1974	3416315
KY	1975	3467769
KY	1976	3529257
KY	1977	3573693
KY	1978	3609976
KY	1979	3641804
KY	1980	3660777
KY	1981	3670394
KY	1982	3683445
KY	1983	3694484
KY	1984	3695453
KY	1985	3694826
KY	1986	3687809
KY	1987	3683329
KY	1988	3679999
KY	1989	3677306
KY	1990	3685296
KY	1991	3714686
KY	1992	3756358
KY	1993	3792288
KY	1994	3823215
KY	1995	3855248
KY	1996	3881051
KY	1997	3907816
KY	1998	3934310
KY	1999	3960825
KY	2000	4048831
KY	2001	4066442
KY	2002	4086754
KY	2003	4110922
KY	2004	4135567
KY	2005	4165958
KY	2006	4199440
KY	2007	4236308
KY	2008	4269245
LA	1910	1667000
LA	1911	1695000
LA	1912	1709000
LA	1913	1727000
LA	1914	1740000
LA	1915	1755000
LA	1916	1799000
LA	1917	1795000
LA	1918	1746000
LA	1919	1756000
LA	1920	1813000
LA	1921	1847000
LA	1922	1871000
LA	1923	1903000
LA	1924	1939000
LA	1925	1972000
LA	1926	2005000
LA	1927	2039000
LA	1928	2064000
LA	1929	2086000
LA	1930	2105000
LA	1931	2124000
LA	1932	2155000
LA	1933	2178000
LA	1934	2202000
LA	1935	2228000
LA	1936	2246000
LA	1937	2257000
LA	1938	2285000
LA	1939	2334000
LA	1940	2370000
LA	1941	2484000
LA	1942	2546000
LA	1943	2565000
LA	1944	2508000
LA	1945	2429000
LA	1946	2556000
LA	1947	2579000
LA	1948	2596000
LA	1949	2634000
LA	1950	2697000
LA	1951	2769000
LA	1952	2842000
LA	1953	2866000
LA	1954	2883000
LA	1955	2946000
LA	1956	3032000
LA	1957	3115000
LA	1958	3155000
LA	1959	3208000
LA	1960	3260000
LA	1961	3287000
LA	1962	3345000
LA	1963	3377000
LA	1964	3446000
LA	1965	3496000
LA	1966	3550000
LA	1967	3581000
LA	1968	3603000
LA	1969	3619000
LA	1970	3644637
LA	1971	3710487
LA	1972	3761646
LA	1973	3788375
LA	1974	3820109
LA	1975	3886104
LA	1976	3950605
LA	1977	4014459
LA	1978	4068579
LA	1979	4137665
LA	1980	4205900
LA	1981	4283303
LA	1982	4352608
LA	1983	4395316
LA	1984	4400477
LA	1985	4408118
LA	1986	4406919
LA	1987	4344148
LA	1988	4288863
LA	1989	4252894
LA	1990	4219973
LA	1991	4240950
LA	1992	4270849
LA	1993	4284749
LA	1994	4306500
LA	1995	4327978
LA	1996	4338763
LA	1997	4351390
LA	1998	4362758
LA	1999	4372035
LA	2000	4468879
LA	2001	4460395
LA	2002	4465215
LA	2003	4473558
LA	2004	4487830
LA	2005	4495627
LA	2006	4243634
LA	2007	4373310
LA	2008	4410796
MA	1910	3365000
MA	1911	3383000
MA	1912	3440000
MA	1913	3534000
MA	1914	3636000
MA	1915	3705000
MA	1916	3726000
MA	1917	3738000
MA	1918	3695000
MA	1919	3785000
MA	1920	3882000
MA	1921	3951000
MA	1922	4010000
MA	1923	4057000
MA	1924	4102000
MA	1925	4154000
MA	1926	4194000
MA	1927	4223000
MA	1928	4217000
MA	1929	4229000
MA	1930	4250000
MA	1931	4248000
MA	1932	4259000
MA	1933	4282000
MA	1934	4305000
MA	1935	4343000
MA	1936	4355000
MA	1937	4358000
MA	1938	4365000
MA	1939	4347000
MA	1940	4318000
MA	1941	4389000
MA	1942	4370000
MA	1943	4257000
MA	1944	4192000
MA	1945	4201000
MA	1946	4494000
MA	1947	4580000
MA	1948	4674000
MA	1949	4741000
MA	1950	4686000
MA	1951	4654000
MA	1952	4650000
MA	1953	4806000
MA	1954	4910000
MA	1955	4882000
MA	1956	4891000
MA	1957	4929000
MA	1958	5010000
MA	1959	5117000
MA	1960	5160000
MA	1961	5219000
MA	1962	5263000
MA	1963	5344000
MA	1964	5448000
MA	1965	5502000
MA	1966	5535000
MA	1967	5594000
MA	1968	5618000
MA	1969	5650000
MA	1970	5689170
MA	1971	5737580
MA	1972	5760302
MA	1973	5781172
MA	1974	5773548
MA	1975	5757756
MA	1976	5743672
MA	1977	5738199
MA	1978	5736469
MA	1979	5738404
MA	1980	5737037
MA	1981	5768685
MA	1982	5771222
MA	1983	5799407
MA	1984	5840773
MA	1985	5880733
MA	1986	5902678
MA	1987	5935204
MA	1988	5979982
MA	1989	6015478
MA	1990	6016425
MA	1991	5998652
MA	1992	5993474
MA	1993	6010884
MA	1994	6031352
MA	1995	6062335
MA	1996	6085393
MA	1997	6115476
MA	1998	6144407
MA	1999	6175169
MA	2000	6362583
MA	2001	6407269
MA	2002	6433043
MA	2003	6441440
MA	2004	6437414
MA	2005	6434343
MA	2006	6443424
MA	2007	6467915
MA	2008	6497967
MD	1910	1302000
MD	1911	1324000
MD	1912	1345000
MD	1913	1368000
MD	1914	1389000
MD	1915	1401000
MD	1916	1415000
MD	1917	1428000
MD	1918	1467000
MD	1919	1445000
MD	1920	1464000
MD	1921	1492000
MD	1922	1509000
MD	1923	1521000
MD	1924	1537000
MD	1925	1556000
MD	1926	1576000
MD	1927	1599000
MD	1928	1610000
MD	1929	1621000
MD	1930	1636000
MD	1931	1657000
MD	1932	1678000
MD	1933	1694000
MD	1934	1710000
MD	1935	1729000
MD	1936	1745000
MD	1937	1754000
MD	1938	1766000
MD	1939	1793000
MD	1940	1839000
MD	1941	1913000
MD	1942	1998000
MD	1943	2089000
MD	1944	2118000
MD	1945	2096000
MD	1946	2214000
MD	1947	2248000
MD	1948	2271000
MD	1949	2329000
MD	1950	2355000
MD	1951	2441000
MD	1952	2500000
MD	1953	2567000
MD	1954	2685000
MD	1955	2742000
MD	1956	2811000
MD	1957	2873000
MD	1958	2982000
MD	1959	3066000
MD	1960	3113000
MD	1961	3176000
MD	1962	3263000
MD	1963	3386000
MD	1964	3492000
MD	1965	3600000
MD	1966	3695000
MD	1967	3757000
MD	1968	3815000
MD	1969	3868000
MD	1970	3923897
MD	1971	4018324
MD	1972	4073499
MD	1973	4097974
MD	1974	4118815
MD	1975	4139096
MD	1976	4150539
MD	1977	4169595
MD	1978	4183603
MD	1979	4191160
MD	1980	4216975
MD	1981	4261905
MD	1982	4282923
MD	1983	4313327
MD	1984	4365243
MD	1985	4413071
MD	1986	4486957
MD	1987	4565557
MD	1988	4657904
MD	1989	4727301
MD	1990	4781468
MD	1991	4856176
MD	1992	4902545
MD	1993	4942504
MD	1994	4985411
MD	1995	5023650
MD	1996	5057142
MD	1997	5092914
MD	1998	5130072
MD	1999	5171634
MD	2000	5310451
MD	2001	5375659
MD	2002	5439327
MD	2003	5495009
MD	2004	5538989
MD	2005	5575552
MD	2006	5602258
MD	2007	5618899
MD	2008	5633597
ME	1910	745000
ME	1911	751000
ME	1912	753000
ME	1913	763000
ME	1914	772000
ME	1915	774000
ME	1916	775000
ME	1917	777000
ME	1918	760000
ME	1919	762000
ME	1920	771000
ME	1921	775000
ME	1922	778000
ME	1923	781000
ME	1924	788000
ME	1925	792000
ME	1926	793000
ME	1927	796000
ME	1928	797000
ME	1929	797000
ME	1930	8e+05
ME	1931	807000
ME	1932	815000
ME	1933	821000
ME	1934	829000
ME	1935	836000
ME	1936	840000
ME	1937	842000
ME	1938	843000
ME	1939	846000
ME	1940	849000
ME	1941	852000
ME	1942	839000
ME	1943	806000
ME	1944	801000
ME	1945	8e+05
ME	1946	832000
ME	1947	854000
ME	1948	878000
ME	1949	903000
ME	1950	917000
ME	1951	916000
ME	1952	915000
ME	1953	913000
ME	1954	927000
ME	1955	934000
ME	1956	938000
ME	1957	943000
ME	1958	944000
ME	1959	957000
ME	1960	975000
ME	1961	995000
ME	1962	994000
ME	1963	993000
ME	1964	993000
ME	1965	997000
ME	1966	999000
ME	1967	1004000
ME	1968	994000
ME	1969	992000
ME	1970	993722
ME	1971	1015390
ME	1972	1034292
ME	1973	1045655
ME	1974	1059040
ME	1975	1071995
ME	1976	1088412
ME	1977	1103578
ME	1978	1113566
ME	1979	1122563
ME	1980	1124660
ME	1981	1133033
ME	1982	1136684
ME	1983	1144772
ME	1984	1155635
ME	1985	1162936
ME	1986	1170126
ME	1987	1184574
ME	1988	1203840
ME	1989	1219961
ME	1990	1227928
ME	1991	1235439
ME	1992	1235748
ME	1993	1238256
ME	1994	1237687
ME	1995	1237438
ME	1996	1241436
ME	1997	1245215
ME	1998	1247554
ME	1999	1253040
ME	2000	1277179
ME	2001	1284663
ME	2002	1293667
ME	2003	1302729
ME	2004	1307904
ME	2005	1311044
ME	2006	1313355
ME	2007	1315398
ME	2008	1316456
MI	1910	2832000
MI	1911	2916000
MI	1912	2997000
MI	1913	3101000
MI	1914	3183000
MI	1915	3263000
MI	1916	3353000
MI	1917	3451000
MI	1918	3499000
MI	1919	3591000
MI	1920	3723000
MI	1921	3872000
MI	1922	3942000
MI	1923	4063000
MI	1924	4214000
MI	1925	4331000
MI	1926	4451000
MI	1927	4589000
MI	1928	4665000
[truncated: 2,852 more rows]
